# Supplementary material for: Microcephaly Gene Mcph1 Deficiency Induces p19ARF-Dependent Cell Cycle Arrest and Senescence
Source: MDPI journal article supplement (doi:10.3390/ijms25094597), 2024-04-23
Supplement: s1 [file s1]

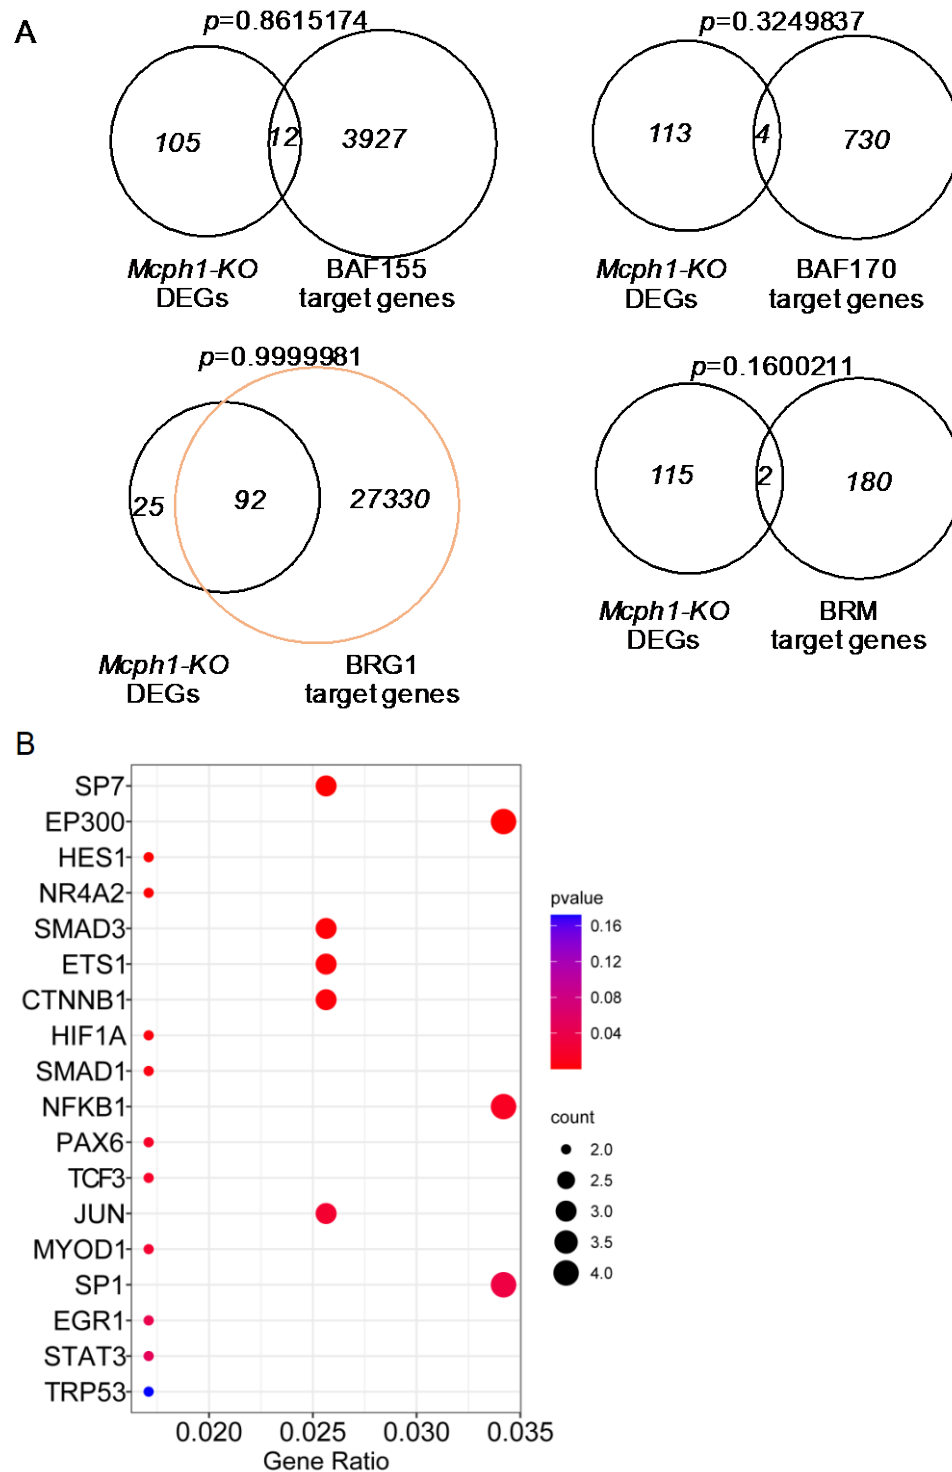

**Figure S1.** *Mcph1* DEGs were not associated with transcriptional regulation of the SWI/SNF complex and E2F1. (A) The Venn diagrams represent the number of intersecting genes between *Mcph1*-KO DEGs and the target genes of the core proteins of the SWI/SNF complex. The core proteins in this complex are BAF155, BAF170, BRG1, and BRM.  $p > 0.05$  indicates no statistical significance. Statistical analysis was performed using Fisher's exact test. (B) *Mcph1*-KO DEGs transcription factor prediction analysis.

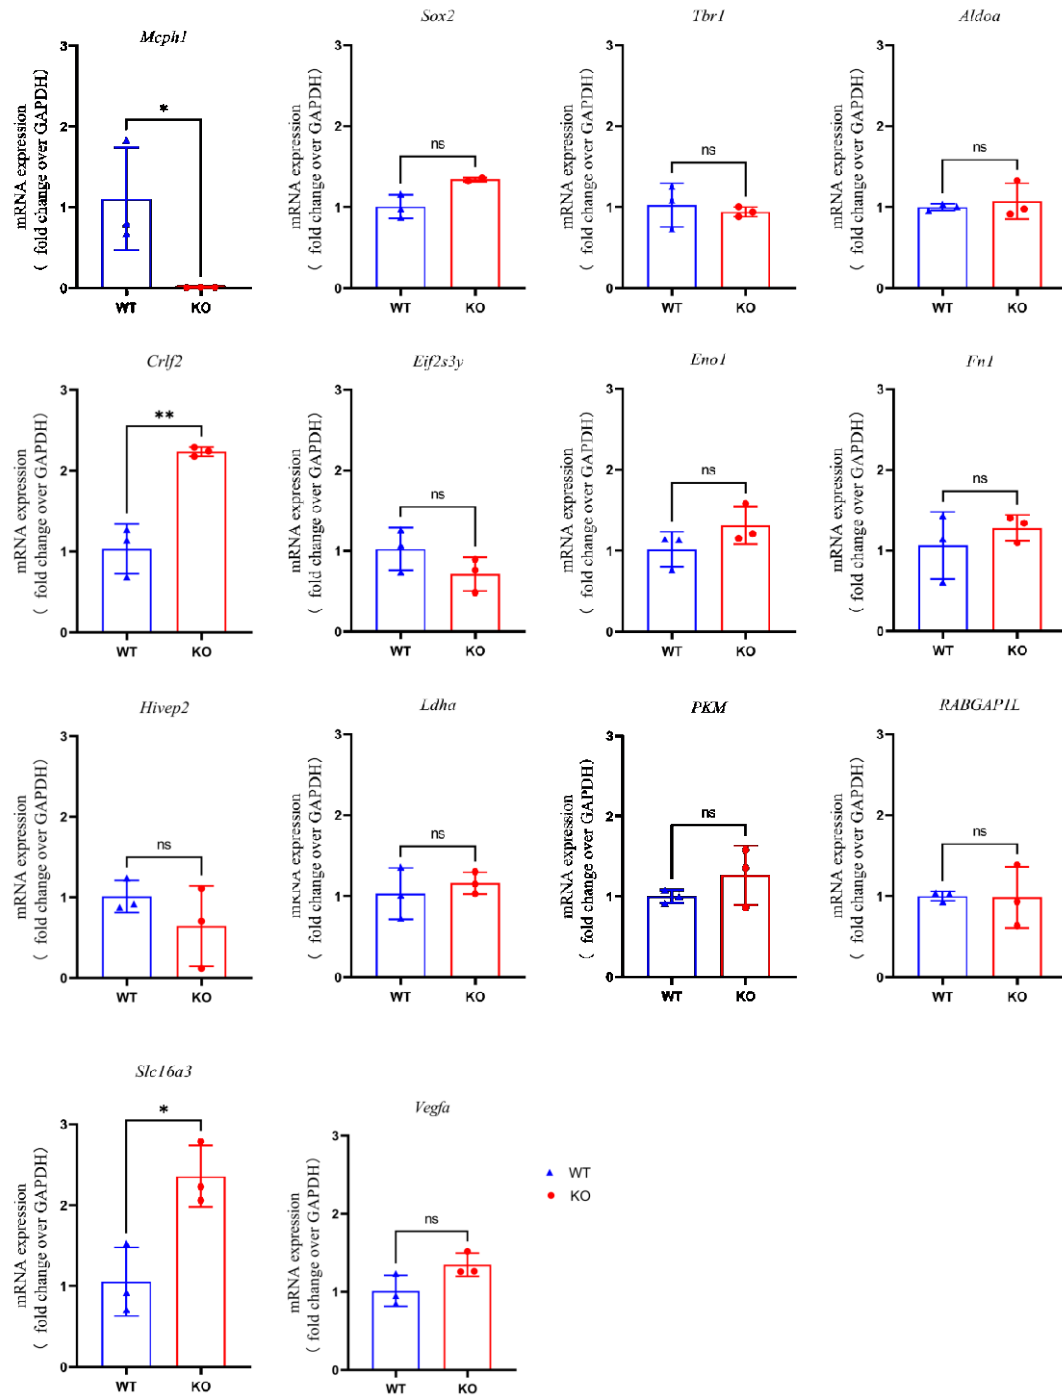

**Figure S2.** Expression verification of intersecting genes related to neurodevelopment. WT is the control group, and KO is the knockout of the *Mcph1* group. The expression of DEGs in the control and *Mcph1*-KO groups was detected by RT-qPCR.

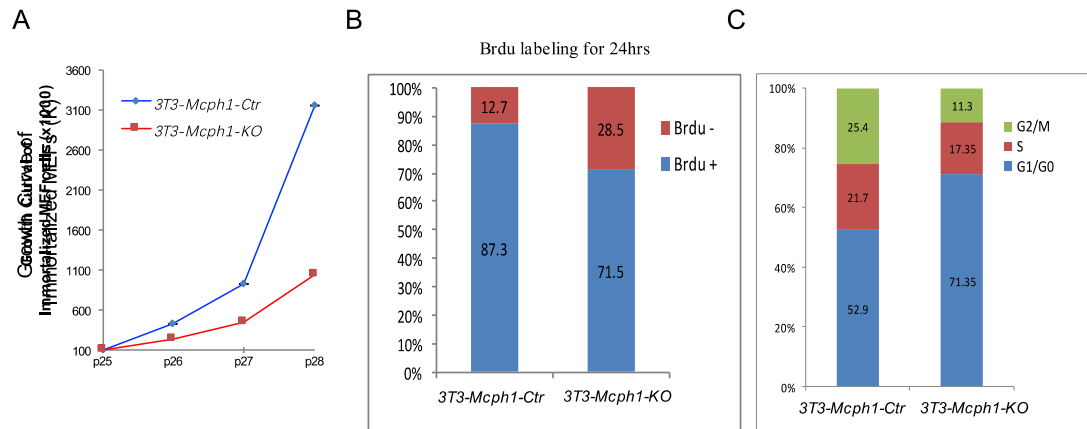

**Figure S3.** *Mcph1* affects cell proliferation in immortalized MEFs. (A) Growth curves of *Mcph1*-Ctr and *Mcph1*-KO immortalized MEFs. The immortalized cells have a good proliferation capability. Cells were harvested by trypsinization and counted once per passage. P25, cells at passage 25; P26, cells at passage 26; P27, cells at passage 27, and P28, cells at passage 28. (B) Immobilized MEFs, stained with BrdU antibody, and quantitative flow cytometric analysis showed that BrdU-labeled *Mcph1*-KO cells decreased at 24 h. (C) The distribution of the cell cycle was detected by flow cytometry with PI staining. The percentages of the G1, S, and G2/M phases were calculated.

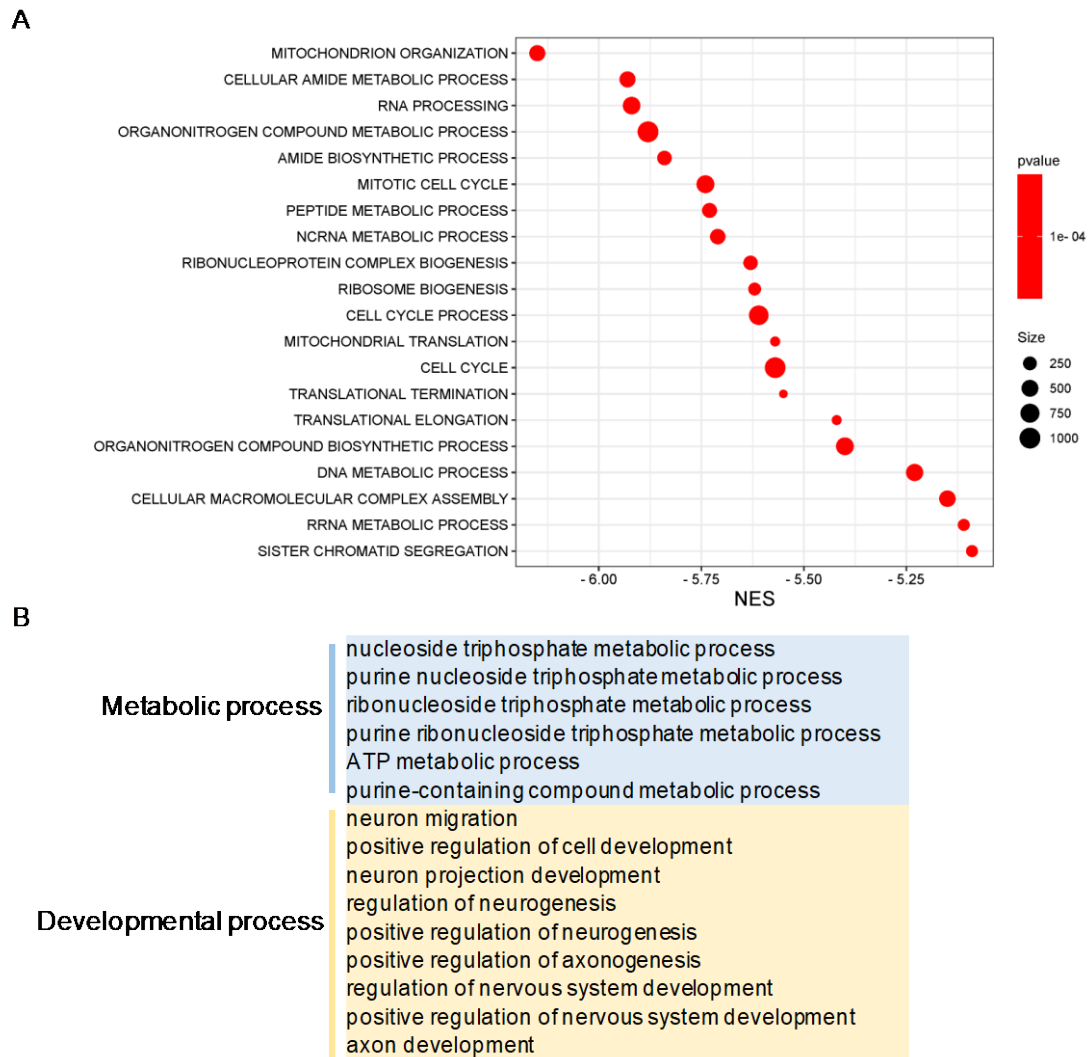

**Figure S4.** *Mcph1* may cause cell cycle-dependent metabolic changes (A) The biological process of the DEGs in the results of Nathalie Journiac et al[1]. The figure shows the top 20 biological processes, including metabolism-related and cell cycle related (B) We used metascape to perform the same analysis on our DEGs and their DEGs[1]. The intersection of the two different genes focuses on metabolism and development.

**Table S1.** Summary of intersecting genes information

| NO. | Intersecting Gene               | log2FoldChange | P adj       | Site Count* | Remark                                                                                                                                 |
|-----|---------------------------------|----------------|-------------|-------------|----------------------------------------------------------------------------------------------------------------------------------------|
| 1   | <i>Ldha</i>                     | 0.53258291     | 1.40E-06    | 4           | <i>Ldha</i> can affect neuronal excitability[2].                                                                                       |
| 2   | <i>Tcf7l1</i>                   | 0.534401708    | 0.047987897 | 4           | -                                                                                                                                      |
| 3   | <i>Vegfa</i>                    | 0.584031025    | 0.00033305  | 3           | <i>Vegfa</i> affects embryonic angiogenesis[3].                                                                                        |
| 4   | <i>Hey1</i>                     | 0.460385188    | 0.029574475 | 3           | -                                                                                                                                      |
| 5   | <i>Aldoa</i>                    | 0.310349563    | 0.047987897 | 3           | <i>Aldoa</i> is related to cytoskeletal development and function[4].                                                                   |
| 6   | <i>Slc16a3</i>                  | 1.274481753    | 9.16E-06    | 2           | Deletion of <i>Slc16a3</i> is likely to result in decreased lactate in the embryo's blood and a decrease in the embryo's growth[5, 6]. |
| 7   | <i>Tpi1</i>                     | 0.444301423    | 8.25E-05    | 2           | -                                                                                                                                      |
| 8   | <i>Eno1</i>                     | 0.436598496    | 0.000176167 | 2           | <i>Eno1</i> inactivation causes delayed brain development[7, 8].                                                                       |
| 9   | <i>Crlf2</i>                    | 0.884397108    | 0.000936195 | 2           | <i>Crlf2</i> is involved in neuronal signaling, and patients have symptoms of microcephaly[9].                                         |
| 10  | <i>Fn1</i>                      | 0.378091826    | 0.001353569 | 2           | Mouse embryos lacking <i>Fn1</i> have defects in mesoderm and neural tube development[10].                                             |
| 11  | <i>Lcp1</i>                     | 0.521461793    | 0.002515204 | 2           | -                                                                                                                                      |
| 12  | <i>Pkm</i>                      | 0.338713642    | 0.003225653 | 2           | <i>Pkm</i> is related to synaptic plasticity[2, 11].                                                                                   |
| 13  | <i>Rabgap1l</i>                 | -0.342916124   | 0.00422707  | 2           | <i>Rabgap1l</i> is differentially methylated in Zika-induced microcephaly[12].                                                         |
| 14  | <i>Spp1</i>                     | 1.198484624    | 0.011059793 | 2           | -                                                                                                                                      |
| 15  | <i>Hivep2</i>                   | -0.348226286   | 0.016053953 | 2           | Mutations in the <i>Hivep2</i> gene cause developmental delay/intellectual disability[13].                                             |
| 16  | <i>Nxn</i>                      | 0.40763114     | 0.01743748  | 2           | -                                                                                                                                      |
| 17  | <i>Eif2s3y</i>                  | -0.42710408    | 0.019913806 | 2           | <i>Eif2s3y</i> can inhibit the pluripotency state of embryonic stem cells in mice[8].                                                  |
| 18  | <i>Gm37844</i>                  | -0.88957664    | 0.021387194 | 2           | -                                                                                                                                      |
| 19  | <i>Inhba</i>                    | -0.8904405     | 0.046788412 | 2           | -                                                                                                                                      |
| 20  | <i>Ddit4</i>                    | 0.469127086    | 0.047987897 | 2           | -                                                                                                                                      |
| 21  | <i>Satb2</i>                    | -0.72840142    | 2.19E-06    | 1           | Mutations in the <i>Satb2</i> gene cause developmental delay/intellectual disability[6].                                               |
| 22  | <i>Sla</i>                      | -0.603553268   | 0.000122916 | 1           | -                                                                                                                                      |
| 23  | <i>9130024F11</i><br><i>Rik</i> | -0.710580795   | 0.00033305  | 1           | -                                                                                                                                      |

Table S1. (Continued)

| NO. | Intersecting<br>Gene     | log2FoldChange | P adj       | Site<br>Count* | Remark                                                                                     |
|-----|--------------------------|----------------|-------------|----------------|--------------------------------------------------------------------------------------------|
| 24  | <i>Mef2c</i>             | -0.414368576   | 0.001570872 | 1              | -                                                                                          |
| 25  | <i>Fam49a</i>            | -0.342475004   | 0.002471334 | 1              | -                                                                                          |
| 26  | <i>Alas2</i>             | -1.196964327   | 0.002515204 | 1              | -                                                                                          |
| 27  | <i>Crb2</i>              | 0.509924247    | 0.002920479 | 1              | -                                                                                          |
| 28  | <i>Pfkl</i>              | 0.373654061    | 0.003110287 | 1              | -                                                                                          |
| 29  | <i>Dlk1</i>              | 0.556029226    | 0.003225653 | 1              | -                                                                                          |
| 30  | 2610318N02<br><i>Rik</i> | 0.754241912    | 0.003260079 | 1              | -                                                                                          |
| 31  | <i>Dok6</i>              | -0.398228958   | 0.004321018 | 1              | -                                                                                          |
| 32  | <i>Pgk1</i>              | 0.352225734    | 0.006154432 | 1              | -                                                                                          |
| 33  | <i>Gnai1</i>             | -0.359240218   | 0.007113982 | 1              | -                                                                                          |
| 34  | <i>Dll3</i>              | 0.612639822    | 0.009379012 | 1              | -                                                                                          |
| 35  | <i>Cdkn1c</i>            | 0.335603094    | 0.011059793 | 1              | Mutations in the <i>Cdkn1c</i> gene cause developmental delay/intellectual disability[14]. |
| 36  | <i>Fut10</i>             | -0.926136173   | 0.011932979 | 1              | -                                                                                          |
| 37  | <i>Neurog2</i>           | 0.401683379    | 0.011932979 | 1              | -                                                                                          |
| 38  | <i>Ccnd3</i>             | 0.44717396     | 0.019519963 | 1              | -                                                                                          |
| 39  | 1700048O20<br><i>Rik</i> | 0.804420254    | 0.019519963 | 1              | -                                                                                          |
| 40  | <i>Slc2a1</i>            | 0.399721042    | 0.030723065 | 1              | -                                                                                          |
| 41  | <i>Nr4a3</i>             | -0.425268553   | 0.030892622 | 1              | -                                                                                          |
| 42  | <i>Kcnn1</i>             | 0.55633904     | 0.031913054 | 1              | -                                                                                          |
| 43  | <i>Gria2</i>             | -0.279563023   | 0.032771223 | 1              | -                                                                                          |
| 44  | <i>Tmem132b</i>          | -0.320917809   | 0.032952499 | 1              | -                                                                                          |
| 45  | <i>Mctp1</i>             | -0.698451514   | 0.03545619  | 1              | -                                                                                          |
| 46  | <i>Neurog1</i>           | 0.770946401    | 0.040967524 | 1              | -                                                                                          |
| 47  | <i>Rhbdl3</i>            | 0.390346143    | 0.043599623 | 1              | -                                                                                          |
| 48  | <i>Necab1</i>            | -0.486480137   | 0.046488149 | 1              | -                                                                                          |
| 49  | <i>Mpped1</i>            | -0.309551635   | 0.047922476 | 1              | -                                                                                          |
| 50  | <i>Ntrk3</i>             | -0.277612814   | 0.047987897 | 1              | -                                                                                          |
| 51  | <i>Zic3</i>              | 0.368405971    | 0.049918514 | 1              | -                                                                                          |

\* Count of E2F1 binding sequence

**Table S2.** Primers used in this study

| Gene name        | Primer         | Sequence (5'to 3')                  |
|------------------|----------------|-------------------------------------|
| <i>Satb2</i>     | Forward Primer | GAGATGAGTTGAAGAGGGCTAGTG            |
|                  | Reverse Primer | CCCTGTGTGCGGTTGAAT                  |
| <i>Ldha</i>      | Forward Primer | AGCGTACCCGTGATGCTAAC                |
|                  | Reverse Primer | CAGGGTTGGCAGATCGACAT                |
| <i>Aldoa</i>     | Forward Primer | AACGGTCACACACTTCGTCG                |
|                  | Reverse Primer | TACTTTCCTTGACAAGCGAGGC              |
| <i>Vegfa</i>     | Forward Primer | GCAGGCTGCTGTAACGATGAA               |
|                  | Reverse Primer | TGCTTTCTCCGCTCTGAACAA               |
| <i>Eif2s3y</i>   | Forward Primer | ATCTTGTCTCAACCTCAGACT               |
|                  | Reverse Primer | TTCTTTAGCCTGGCTTTCTTTCA             |
| <i>Hivep2</i>    | Forward Primer | CTCCTTTCTCCTCCCGAGCG                |
|                  | Reverse Primer | GATCCCGAGGCTACTGGCTG                |
| <i>Rabgap1l</i>  | Forward Primer | ACTGGGAATCTTCATGAGAAGCTGA           |
|                  | Reverse Primer | TCACATTACTGTGCTTGATACACCA           |
| <i>Pkm</i>       | Forward Primer | GGAGGAGGAATGCAGGACTGG               |
|                  | Reverse Primer | GGAGTGCACAAGAAGTGGGGA               |
| <i>Fn1</i>       | Forward Primer | AACAAGAGACCACTGGCACC                |
|                  | Reverse Primer | AGAGGATTGCTTTCCCTGCC                |
| <i>Eno1</i>      | Forward Primer | CGACTGTATGGAATCCAAGGCA              |
|                  | Reverse Primer | CCAGCTTTGCAGACAGCCA                 |
| <i>Crlf2</i>     | Forward Primer | GCAGGTGATGTCACAGTCGT                |
|                  | Reverse Primer | GCGCTGCCTAGCCTTAAACA                |
| <i>Slc16a3</i>   | Forward Primer | GGCTGTTTTATCATCACGGGT               |
|                  | Reverse Primer | GTGTCGCTGTAGCCAATCCC                |
| <i>Cdkn1c</i>    | Forward Primer | AGCTGAAGGACCAGCCTCTCTC              |
|                  | Reverse Primer | ACGTCGTTCGACGCCTTGTTCT              |
| <i>mGapdh</i>    | Forward Primer | GCACAGTCAAGGCCGAGAAT                |
|                  | Reverse Primer | GCCTTCTCCATGGTGGTGAA                |
| 1000-Cdkn1c-pGL3 | Forward Primer | TTACGCGTGCTAGCCCCGGGCTCGAGGTTG      |
|                  |                | GAGGGCTAGATGGGGAACCTT               |
|                  | Reverse Primer | ACCTTAGTTGGCTGGAAGTAGTTATGCTA       |
| 2000-Cdkn1c-pGL3 |                | GAAAAG                              |
|                  | Forward Primer | TTACGCGTGCTAGCCCCGGGCTCGAGGGGG      |
|                  | Reverse Primer | GTCGAATATGGCCTGA                    |
|                  |                | atgcagatcgagatctcgagCTGCACCAACTGATT |
|                  |                | AGGGCTT                             |

## References

1. Journiac, N.; Gilabert-Juan, J.; Cipriani, S.; Benit, P.; Liu, X.; Jacquier, S.; Faivre, V.; Delahaye-Duriez, A.; Csaba, Z.; Hourcade, T.; Melinte, E.; Lebon, S.; Violle-Poirsier, C.; Oury, J. F.; Adle-Biasette, H.; Wang, Z. Q.; Mani, S.; Rustin, P.; Gressens, P.; Nardelli, J., Cell Metabolic Alterations due to Mcph1 Mutation in Microcephaly. *Cell Rep* **2020**, *31*, (2), 107506.
2. Yao, S.; Xu, M. D.; Wang, Y.; Zhao, S. T.; Wang, J.; Chen, G. F.; Chen, W. B.; Liu, J.; Huang, G. B.; Sun, W. J.; Zhang, Y. Y.; Hou, H. L.; Li, L.; Sun, X. D., Astrocytic lactate dehydrogenase A regulates neuronal excitability and depressive-like behaviors through lactate homeostasis in mice. *Nat Commun* **2023**, *14*, (1), 729.
3. Casas, B. S.; Vitória, G.; do Costa, M. N.; Madeiro da Costa, R.; Trindade, P.; Maciel, R.; Navarrete, N.; Rehen, S. K.; Palma, V., hiPSC-derived neural stem cells from patients with schizophrenia induce an impaired angiogenesis. *Transl Psychiatry* **2018**, *8*, (1), 48.
4. Hoffman, J. L.; Faccidomo, S.; Kim, M.; Taylor, S. M.; Agoglia, A. E.; May, A. M.; Smith, E. N.; Wong, L. C.; Hodge, C. W., Alcohol drinking exacerbates neural and behavioral pathology in the 3xTg-AD mouse model of Alzheimer's disease. *Int Rev Neurobiol* **2019**, *148*, 169-230.
5. Moreau, J. L.; Artap, S. T.; Shi, H.; Chapman, G.; Leone, G.; Sparrow, D. B.; Dunwoodie, S. L., Cited2 is required in trophoblasts for correct placental capillary patterning. *Dev Biol* **2014**, *392*, (1), 62-79.
6. Zarate, Y. A.; Bosanko, K. A.; Caffrey, A. R.; Bernstein, J. A.; Martin, D. M.; Williams, M. S.; Berry-Kravis, E. M.; Mark, P. R.; Manning, M. A.; Bhambhani, V.; Vargas, M.; Seeley, A. H.; Estrada-Veras, J. I.; van Dooren, M. F.; Schwab, M.; Vanderver, A.; Melis, D.; Alsadah, A.; Sadler, L.; Van Esch, H.; Callewaert, B.; Oostra, A.; Maclean, J.; Dentici, M. L.; Orlando, V.; Lipson, M.; Sparagana, S. P.; Maarup, T. J.; Alsters, S. I.; Brautbar, A.; Kovitch, E.; Naidu, S.; Lees, M.; Smith, D. M.; Turner, L.; Raggio, V.; Spangenberg, L.; Garcia-Miñaur, S.; Roeder, E. R.; Littlejohn, R. O.; Grange, D.; Pfotenhauer, J.; Jones, M. C.; Balasubramanian, M.; Martinez-Monseny, A.; Blok, L. S.; Gavrilova, R.; Fish, J. L., Mutation update for the SATB2 gene. *Hum Mutat* **2019**, *40*, (8), 1013-1029.
7. El Waly, B.; Mignon-Ravix, C.; Cacciagli, P.; Buhler, E.; Ben Zeev, B.; Villard, L., Molecular characterization of a 1p36 chromosomal duplication and in utero interference define ENO1 as a candidate gene for polymicrogyria. *Eur J Hum Genet* **2020**, *28*, (12), 1703-1713.
8. Li, N.; Mu, H.; Zheng, L.; Li, B.; Wu, C.; Niu, B.; Shen, Q.; He, X.; Hua, J., EIF2S3Y suppresses the pluripotency state and promotes the proliferation of mouse embryonic stem cells. *Oncotarget* **2016**, *7*, (10), 11321-31.
9. Paduano, F.; Colao, E.; Loddo, S.; Orlando, V.; Trapasso, F.; Novelli, A.; Perrotti, N.; Iuliano, R., 7q35 Microdeletion and 15q13.3 and Xp22.33 Microduplications in a Patient with Severe Myoclonic Epilepsy, Microcephaly, Dysmorphisms, Severe Psychomotor Delay and Intellectual Disability. *Genes (Basel)* **2020**, *11*, (5).
10. George, E. L.; Georges-Labouesse, E. N.; Patel-King, R. S.; Rayburn, H.; Hynes, R. O., Defects in mesoderm, neural tube and vascular development in mouse embryos lacking fibronectin. *Development* **1993**, *119*, (4), 1079-91.
11. Ferguson, L.; Hu, J.; Cai, D.; Chen, S.; Dunn, T. W.; Pearce, K.; Glanzman, D. L.;



- Schacher, S.; Sossin, W. S., Isoform Specificity of PKMs during Long-Term Facilitation in Aplysia Is Mediated through Stabilization by KIBRA. *J Neurosci* **2019**, *39*, (44), 8632-8644.
12. Anderson, D.; Neri, J.; Souza, C. R. M.; Valverde, J. G.; De Araújo, J. M. G.; Nascimento, M.; Branco, R. C. C.; Arrais, N. M. R.; Lassmann, T.; Blackwell, J. M.; Jeronimo, S. M. B., Zika Virus Changes Methylation of Genes Involved in Immune Response and Neural Development in Brazilian Babies Born With Congenital Microcephaly. *J Infect Dis* **2021**, *223*, (3), 435-440.
  13. Steinfeld, H.; Cho, M. T.; Retterer, K.; Person, R.; Schaefer, G. B.; Danylchuk, N.; Malik, S.; Wechsler, S. B.; Wheeler, P. G.; van Gassen, K. L.; Terhal, P. A.; Verhoeven, V. J.; van Slegtenhorst, M. A.; Monaghan, K. G.; Henderson, L. B.; Chung, W. K., Mutations in HIVEP2 are associated with developmental delay, intellectual disability, and dysmorphic features. *Neurogenetics* **2016**, *17*, (3), 159-64.
  14. Kerns, S. L.; Guevara-Aguirre, J.; Andrew, S.; Geng, J.; Guevara, C.; Guevara-Aguirre, M.; Guo, M.; Oddoux, C.; Shen, Y.; Zurita, A.; Rosenfeld, R. G.; Ostrer, H.; Hwa, V.; Dauber, A., A novel variant in CDKN1C is associated with intrauterine growth restriction, short stature, and early-adulthood-onset diabetes. *J Clin Endocrinol Metab* **2014**, *99*, (10), E2117-22.
